# Supplementary material
Source: PubMed Central journal article supplement (PMC4019169)
Supplement: IAI.00022-14_zii999090718so1.pdf [file IAI.00022-14_zii999090718so1.pdf]

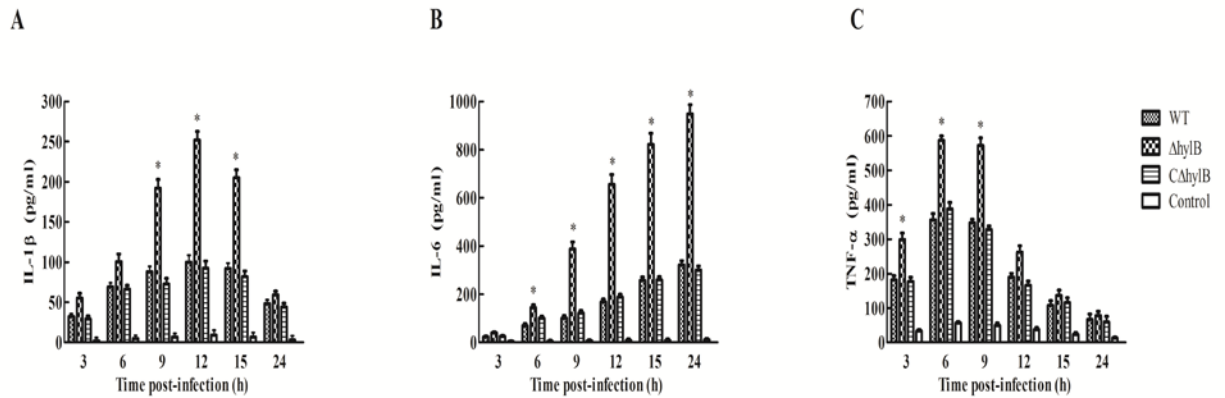

**FIG S1** Intracellular *S. agalactiae* induced cytokine expression in RAW264.7 macrophages. RAW264.7 macrophages were infected with *S. agalactiae* GD201008-001 wild-type (WT), mutant ( $\Delta hylB$ ) and complemented ( $C\Delta hylB$ ) strains at a MOI of 10:1 at 1h. At different time points after infection, the cell culture supernatants were collected from the infected macrophages, and (A) IL-1 $\beta$ , (B) IL-6 and (C) TNF- $\alpha$  levels were measured by ELISA. Uninfected cells served as the control. Data shown are the mean  $\pm$  SEM of no less than six independent experiments. Asterisks indicate those time points when the cytokine levels elicited by the  $\Delta hylB$  mutant were significantly greater ( $P < 0.05$ ) than those produced by wild-type infection.
